# Supplementary material
Source: PubMed Central journal article supplement (PMC11028865)
Supplement: 262_2017_2051_MOESM1_ESM.pdf [file 262_2017_2051_MOESM1_ESM.pdf]

Total lymphocytes and subsets in patients with Chiari Malformation and Posterior fossa tumors

| disease                                 | lymphocytes | CD4   | CD45ROMinusCD4 | CD45ROPlusCD4 | CD4CD25foxp3CD127 | CD8   |
|-----------------------------------------|-------------|-------|----------------|---------------|-------------------|-------|
| Chiari Malformation                     | 32137       | 11114 | 4194           | 7213          | 535               | 9319  |
| Chiari Malformation                     | 33769       | 14436 | 6717           | 7639          | 224               | 6325  |
| Chiari Malformation                     | 41335       | 20658 | 9230           | 10516         | 488               | 6738  |
| Chiari Malformation                     | 22982       | 9862  | 5999           | 4156          | 632               | 4093  |
| Chiari Malformation                     | 35814       | 12462 | 6878           | 5842          | 752               | 7645  |
| Chiari Malformation                     | 29134       | 10096 | 5556           | 5153          | 422               | 9966  |
| Chiari Malformation                     | 21744       | 2917  | 1409           | 1771          | 270               | 2787  |
| Chiari Malformation                     | 27744       | 10935 | 4970           | 6942          | 169               | 5855  |
| Chiari Malformation                     | 30972       | 11720 | 8182           | 3443          | 466               | 8584  |
| Chiari Malformation                     | 31053       | 11286 | 7658           | 3984          | 349               | 7685  |
| Chiari Malformation                     | 30689       | 11789 | 7156           | 4873          | 171               | 8511  |
| Chiari Malformation                     | 33311       | 7655  | 5119           | 3083          | 72                | 6713  |
| Chiari Malformation                     | 30721       | 11757 | 7674           | 3417          | 493               | 6575  |
| Chiari Malformation                     | 27072       | 10460 | 5641           | 4757          | 256               | 7738  |
| Chiari Malformation                     | 29693       | 14391 | 7607           | 7089          | 70                | 5684  |
| Chiari Malformation                     | 29876       | 8052  | 2255           | 6119          | 43                | 8849  |
| Chiari Malformation                     | 25576       | 11299 | 6209           | 4787          | 69                | 6736  |
| Chiari Malformation                     | 128913      | 13963 | 8202           | 6046          | 132               | 11429 |
| Chiari Malformation                     | 24424       | 9057  | 3730           | 5494          | 254               | 6129  |
| Chiari Malformation                     |             |       |                |               |                   |       |
| Chiari Malformation                     | 21246       | 7642  | 3081           | 4345          | 1                 | 5181  |
| Chiari Malformation                     | 24944       | 8589  | 1090           | 3452          | 168               | 5321  |
| Posterior fossa tumor : Medulloblastoma | 37085       | 7922  | 1587           | 5999          | 63                | 11683 |
| Posterior fossa tumor : Medulloblastoma | 31897       | 4846  | 921            | 4719          | 11                | 4467  |
| Posterior fossa tumor : Medulloblastoma | 29275       | 8724  | 6110           | 2880          | 169               | 8329  |
| Posterior fossa tumor : Medulloblastoma | 25901       | 5822  | 2324           | 2658          | 134               | 5435  |
| Posterior fossa tumor : Medulloblastoma | 30272       | 9936  | 3925           | 6063          | 142               | 8099  |
| Posterior fossa tumor : Medulloblastoma | 20551       | 5583  | 1634           | 3747          | 18                | 3509  |
| Posterior fossa tumor : Medulloblastoma | 9594        | 2872  | 358            | 2434          | 374               | 3063  |
| Posterior fossa tumor : Medulloblastoma | 33868       | 7419  | 4217           | 2241          | 32                | 5795  |

Total lymphocytes and subsets in patients with Chiari Malformation and Posterior fossa tumors

|                                             |       |       |      |      |     |       |
|---------------------------------------------|-------|-------|------|------|-----|-------|
| Posterior fossa tumor : Medulloblastoma     | 31852 | 8772  | 5169 | 3815 | 15  | 10352 |
| Posterior fossa tumor : Medulloblastoma     | 34845 | 8498  | 6289 | 2443 | 42  | 7221  |
| Posterior fossa tumor : Medulloblastoma     | 31713 | 12747 | 7344 | 5421 | 87  | 7204  |
| Posterior fossa tumor : Medulloblastoma     | 29278 | 12278 | 8002 | 4367 | 385 | 8727  |
| Posterior fossa tumor : Medulloblastoma     | 35627 | 4377  | 1720 | 2649 | 54  | 3908  |
| Posterior fossa tumor : Medulloblastoma     | 18883 | 3373  | 1230 | 2085 | 11  | 5182  |
| Posterior fossa tumor : Medulloblastoma     | 16330 | 2416  | 644  | 1570 | 20  | 4368  |
| Posterior fossa tumor : Medulloblastoma     | 34645 | 6873  | 1207 | 4984 | 29  | 6370  |
| Posterior fossa tumor : Medulloblastoma     | 17295 | 3780  | 1204 | 2708 | 31  | 2297  |
| Posterior fossa tumor : Medulloblastoma     | 20357 | 4299  | 1620 | 1868 | 55  | 4241  |
| Posterior fossa tumor : Non-Medulloblastoma | 33088 | 5925  | 2398 | 3880 | 94  | 10542 |
| Posterior fossa tumor : Non-Medulloblastoma | 23411 | 5529  | 1348 | 3999 | 71  | 4150  |
| Posterior fossa tumor : Non-Medulloblastoma | 28330 | 10500 | 3897 | 6861 | 84  | 8059  |
| Posterior fossa tumor : Non-Medulloblastoma | 3002  | 433   | 55   | 195  | 18  | 557   |
| Posterior fossa tumor : Non-Medulloblastoma | 32010 | 7166  | 2472 | 4864 | 32  | 8641  |
| Posterior fossa tumor : Non-Medulloblastoma | 23946 | 4705  | 3207 | 2262 | 40  | 3002  |
| Posterior fossa tumor : Non-Medulloblastoma | 30735 | 5524  | 1714 | 3477 | 33  | 5007  |
| Posterior fossa tumor : Non-Medulloblastoma | 33474 | 11611 | 6443 | 5514 | 64  | 5060  |
| Posterior fossa tumor : Non-Medulloblastoma | 21421 | 5494  | 7257 | 3306 | 43  | 7431  |
| Posterior fossa tumor : Non-Medulloblastoma | 29447 | 6090  | 2942 | 3437 | 4   | 7400  |
| Posterior fossa tumor : Non-Medulloblastoma | 50537 | 14346 | 3646 | 3209 | 3   | 17087 |
| Posterior fossa tumor : Non-Medulloblastoma | 28456 | 6073  | 1166 | 5071 | 113 | 6719  |
| Posterior fossa tumor : Non-Medulloblastoma | 24296 | 8470  | 3458 | 2724 | 165 | 6109  |
